# Supplementary material for: Unconjugated Bilirubin exerts Pro-Apoptotic Effect on Platelets via p38-MAPK activation
Source: PubMed Central journal article supplement (PMC4602209; doi:10.1038/srep15045), 2015-10-13
Supplement: srep15045-s1.pdf [file srep15045-s1.pdf]

## **Unconjugated Bilirubin exerts Pro-Apoptotic Effect on Platelets *via* p38-MAPK activation**

Somanathapura K. NaveenKumar<sup>1</sup>, Ram M. Thushara<sup>1</sup>, Mahalingam S. Sundaram<sup>1</sup>, Mahadevappa Hemshekhar<sup>1,2</sup>, Manoj Paul<sup>1</sup>, Chinnasamy Thirunavukkarasu<sup>3</sup>, Basappa<sup>4</sup>, Ganesh Nagaraju<sup>5</sup>, Sathees C. Raghavan<sup>5</sup>, Kesturu S. Girish<sup>1,6\*</sup>, Kempaiah Kemparaju<sup>1\*</sup>, Kanchugarakoppal S. Rangappa<sup>7\*</sup>

<sup>1</sup>DOS in Biochemistry, University of Mysore, Manasagangothri, Mysuru-570 006, India; <sup>2</sup> Department of Internal Medicine, Manitoba Centre for Proteomics and Systems Biology, University of Manitoba, Winnipeg-R3E3P4, Canada; <sup>3</sup>Department of Biochemistry and Molecular Biology, Pondicherry Central University, Pondicherry-605 014, India; <sup>4</sup>Laboratory of Chemical Biology, Department of Chemistry, Bangalore University, Bengaluru-560 056, India; <sup>5</sup>Department of Biochemistry, Indian Institute of Science, Bengaluru-560 012, India; <sup>6</sup>Department of Studies and Research in Biochemistry, Tumkur University, Tumkur-572 103, India; <sup>7</sup>DOS in Chemistry, University of Mysore, Manasagangothri, Mysuru-570 006, India;

### **\*Corresponding authors**

#### **Address of correspondence**

**1) Dr. Kanchugarakoppal S. Rangappa**

Professor

DOS in Chemistry, University of Mysore, Karnataka, INDIA

E-mail: [rangappaks@gmail.com](mailto:rangappaks@gmail.com) Tel.: +91-821-2419666

**2) Dr. Kempaiah Kemparaju**

Professor

DOS in Biochemistry, University of Mysore, Karnataka, INDIA

E-mail: [kemparajuom@gmail.com](mailto:kemparajuom@gmail.com) Tel.: +91-9945996543

**3) Dr. Kesturu S. Girish**

Associate Professor

Department of Studies and Research in Biochemistry

Tumkur University, Tumkur-572 103, Karnataka INDIA

University of Mysore, Mysuru-570 006, Karnataka, INDIA

E-mail: [ksgbaboo@gmail.com](mailto:ksgbaboo@gmail.com) Tel.: +91-9964080540

Supplementary information

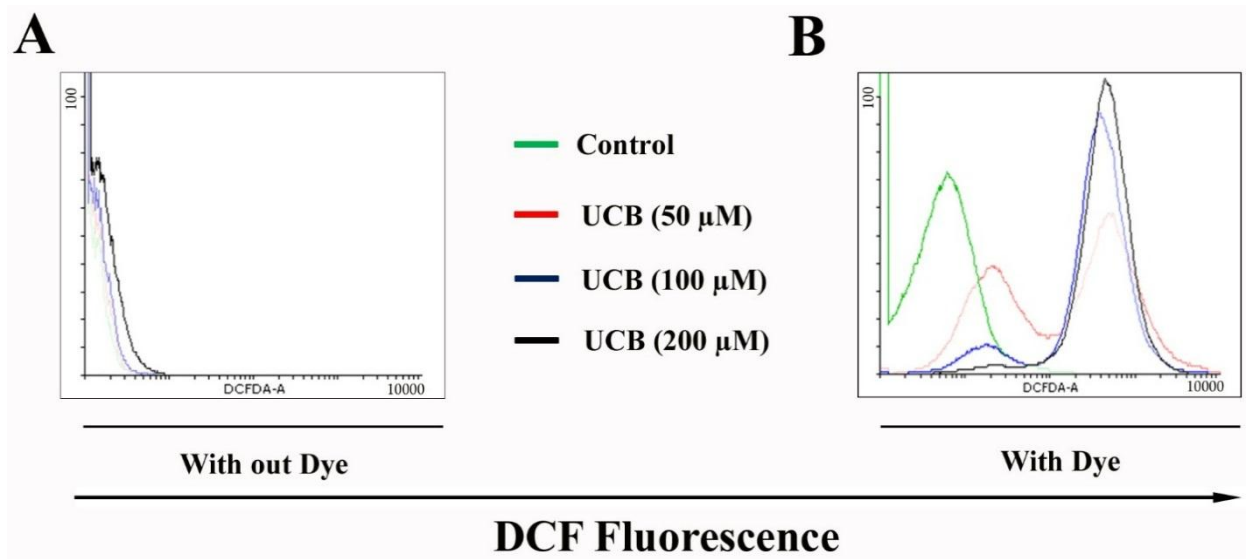

**Supplementary Figure 1: FACS analysis of UCB treated platelets in presence/absence of DCFDA.** Flow cytometric analysis of UCB treated platelets (A) in absence of DCFDA and (B) in presence of DCFDA.

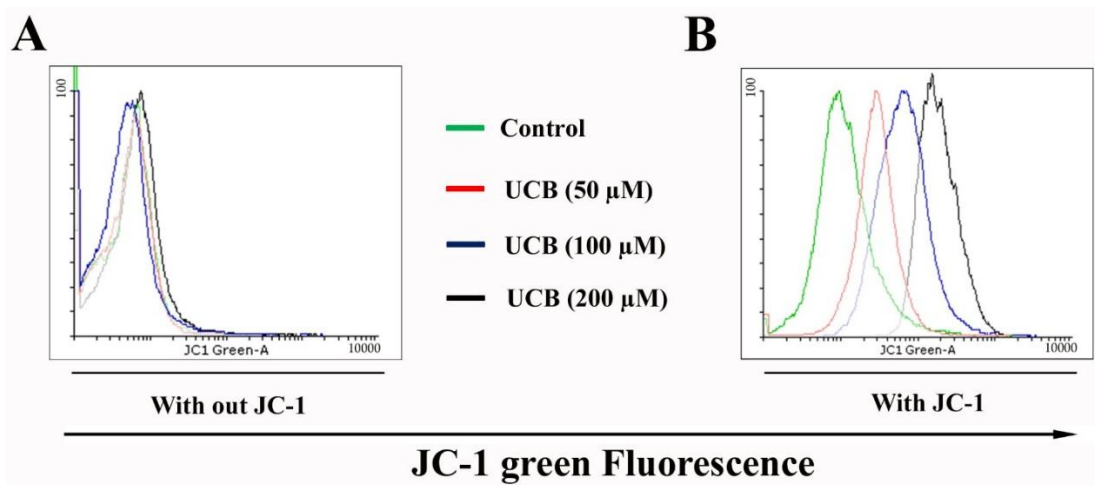

**Supplementary Figure 2: FACS analysis of UCB treated platelets in presence/absence of JC-1.** Flow cytometric analysis of UCB treated platelets (A) in absence of JC-1 and (B) in presence of JC-1.

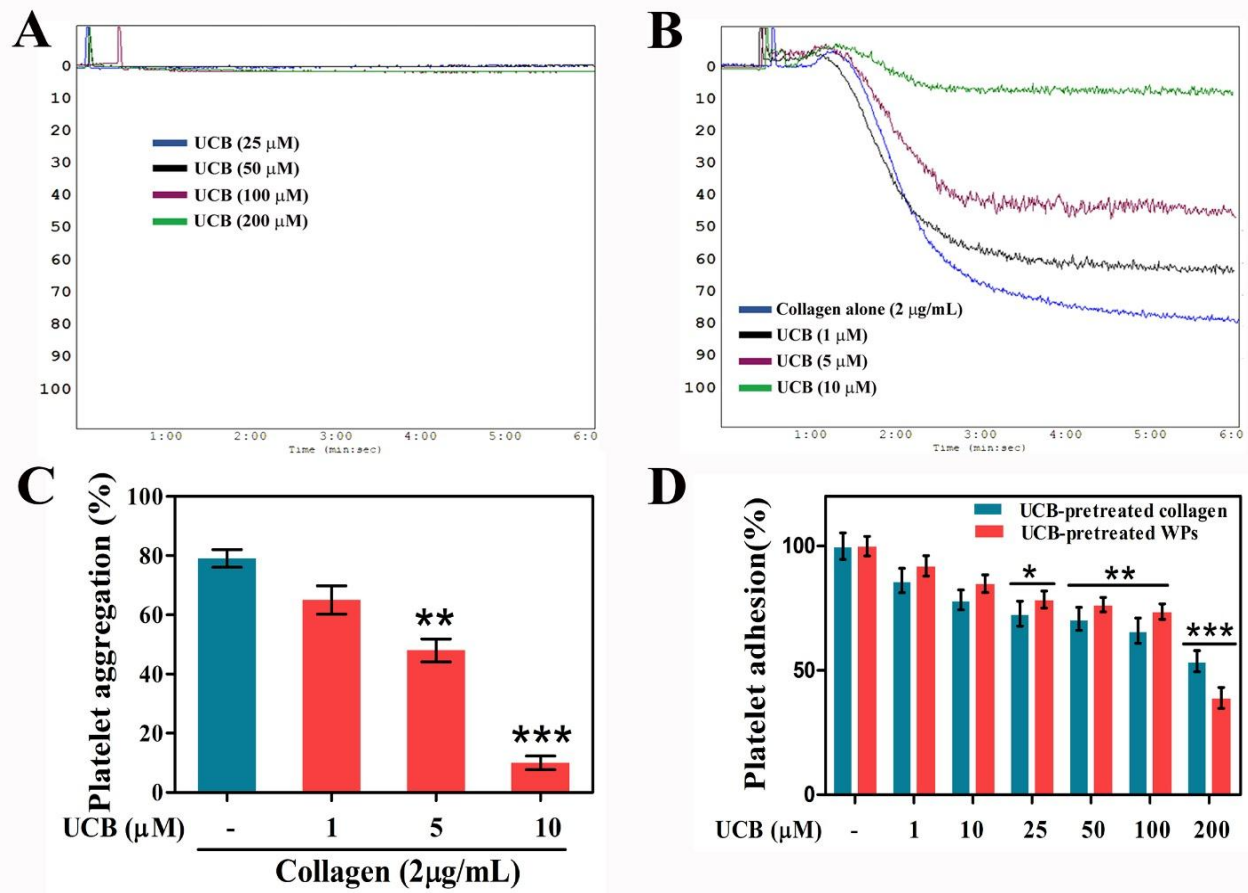

**Supplementary Figure 3: Effect of UCB on platelet aggregation and adhesion.** Effect of UCB on platelet aggregation induced by (A) UCB alone and (B) Collagen. (C) Graphical representation of percentage platelet aggregation with collagen (2 $\mu\text{g/mL}$ ) in presence or absence of UCB. (D) Effect of UCB on platelet adhesion on immobilized collagen type I.  $p^* < 0.05$ ,  $p^{**} < 0.01$ ,  $p^{***} < 0.001$ ; significant compared to control platelets.

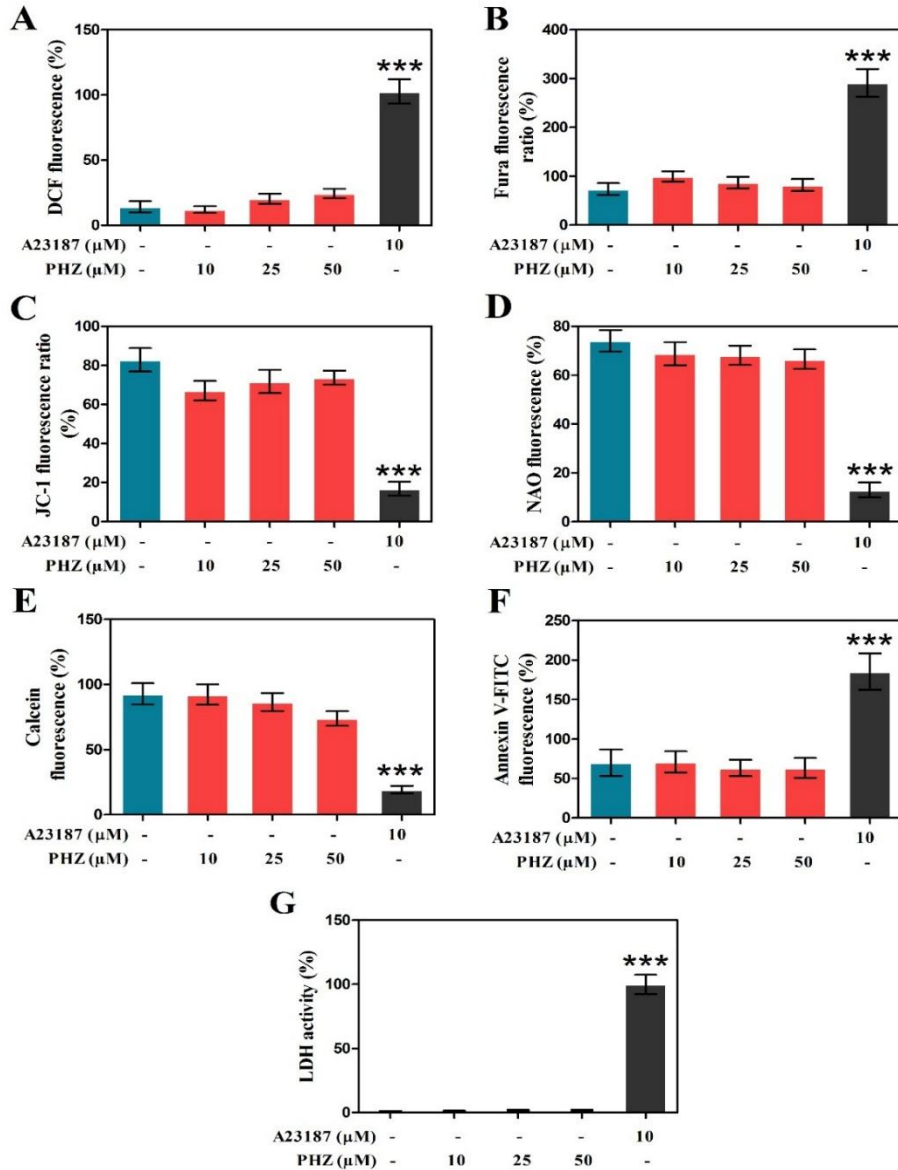

**Supplementary Figure 4: Effect of PHZ on platelet apoptotic markers *in vitro*.** Platelets were treated with the dose that corresponds to the concentration of PHZ in circulation during *in vivo* administration of PHZ and the following markers were determined. (A) ROS, (B) intracellular calcium levels, (C) mitochondrial membrane potential, (D) cardiolipin peroxidation, (E) mPTP formation and (F) PS externalization. Values are presented as mean  $\pm$  SEM (n=5), and expressed as percentage increase/decrease in fluorescence. (G) LDH activity.  $p^{***} < 0.001$ ; significant compared to A23187 treated platelets.

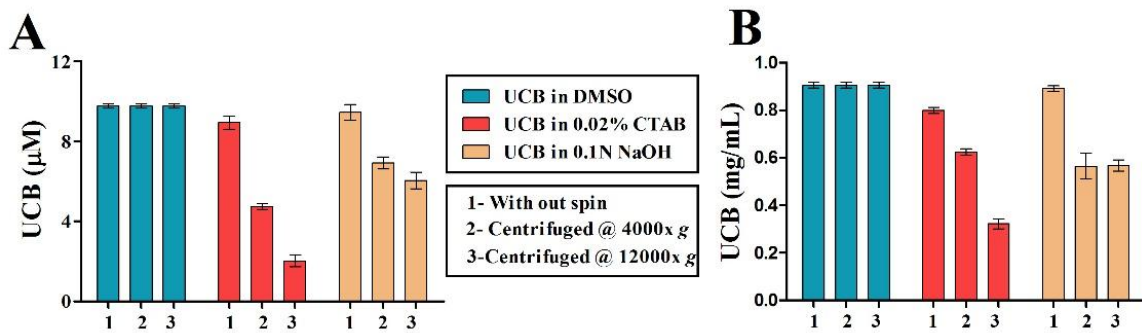

**Supplementary Figure 5: Determination of the concentration of bilirubin.** The concentration of bilirubin dissolved in different solvents was estimated by **(A)** spectrophotometry and **(B)** bilirubin estimation kit.

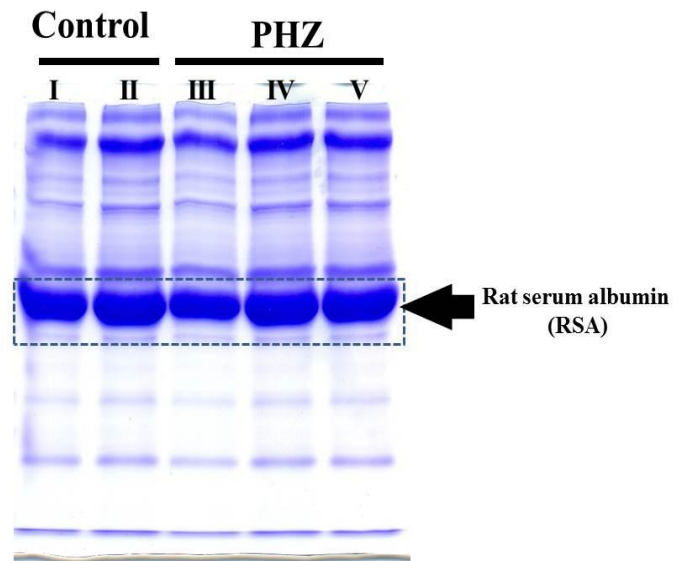

**Supplementary Figure 6:** Full length image of SDS-PAGE from figure 7. Regions of interest are highlighted and are presented as cropped image in figure 7. Samples are as follows; Lane I & II- control group serum, Lane III, IV & V- PHZ treated group serum.

**Supplementary Table 1. Clinical characteristics of HS and HB patients.**

| <b>Characteristics</b>                        |                               | <b>HS</b>      | <b>HB</b>      |
|-----------------------------------------------|-------------------------------|----------------|----------------|
|                                               | <b>Total subjects</b>         | n = 21         | n = 35         |
|                                               | <b>Gender (Males/Females)</b> | 16/05          | 29/06          |
| <b>PLT<br/>count<br/>(x10<sup>3</sup>/μL)</b> | Total subjects                | 327.61 ± 39.37 | 148.14 ± 52.65 |
|                                               | Male                          | 330.56 ± 42.30 | 142.62 ± 55.15 |
|                                               | Female                        | 318.20 ± 25.84 | 172.50 ± 24.85 |
| <b>UCB<br/>concentration<br/>(mg/dL)</b>      | Total subjects                | 0.40 ± 0.21    | 1.57 ± 1.41    |
|                                               | Male                          | 0.42 ± 0.22    | 1.62 ± 1.19    |
|                                               | Female                        | 0.33 ± 0.13    | 2.17 ± 1.91    |

Information in the above table were represented as follows: Data presented for Platelets as mean count ± SD; UCB as mean concentration in mg/dL ± SD
